# Supplementary material for: A cyclic GMP-dependent signalling pathway regulates bacterial phytopathogenesis
Source: PubMed Central journal article supplement (PMC3770947; doi:10.1038/emboj.2013.165), 2013-07-23
Supplement: emboj2013165s1.pdf [file emboj2013165s1.pdf]

## SUPPLEMENTARY INFORMATION

### A cyclic GMP-dependent signaling pathway regulates bacterial phytopathogenesis

Shi-Qi An, Ko-Hsin Chin, Melanie Febrer, Yvonne McCarthy, Jauo-Guey Yang, Chung-Liang Liu, David Swarbreck, Jane Rogers, J. Maxwell Dow, Shan-Ho Chou, Robert P. Ryan

#### Supplementary Materials and Methods

**Bacterial strains, plasmids, and culture conditions.** *Xanthomonas campestris* pv *campestris* (*Xcc*) strains and culture conditions have been described previously (An *et al*, 2013; Slater *et al*, 2000). Most experiments were carried out in NYGB medium, which comprises 5 g liter<sup>-1</sup> bacteriological peptone (Oxoid, Basingstoke, U.K.), 3 g liter<sup>-1</sup> yeast extract (Difco), and 20 g liter<sup>-1</sup> glycerol. For biofilm formation, *Xcc* was grown in L medium, which comprises 10 g liter<sup>-1</sup> bactotryptone (Difco), 5 g liter<sup>-1</sup> yeast extract, 5 g liter<sup>-1</sup> sodium chloride, and 1 g liter<sup>-1</sup> D-glucose. *E. coli* strains were grown in LB medium at 37°C. Other plasmids and strains used are shown in Supplementary Table S4. Where required antibiotics were used at the following concentrations: ampicillin (Amp): 100 µg ml<sup>-1</sup>; rifampicin (Rif): 50 µg ml<sup>-1</sup>; gentamycin (Gm): 20 µg ml<sup>-1</sup>; kanamycin (Km): 20 µg ml<sup>-1</sup>; tetracycline (Tc): 15 µg ml<sup>-1</sup>

**General molecular biology methods.** Common molecular biological methods such as isolation of plasmid and chromosomal DNA, polymerase chain reaction (PCR), plasmid transformation as well as restriction digestion were carried out using standard protocols (Sambrook *et al*, 1989). PCR products were cleaned using the QIAquick PCR purification kit (Qiagen) and DNA fragments were recovered from agarose gels using QIAquick mini-elute gel purification kit (Qiagen). Primer sequences are available on request.

**Transposon mutagenesis and screening.** A library of mutants in the *Xcc* 8004 strain was constructed using mariner transposon vector pBT20 as previously described (McCarthy *et al*, 2010). Briefly, 100 ng of transposon-containing plasmid was electroporated into newly prepared electrocompetent *Xcc* cells. Strains carrying the transposon insertion were identified by selection on Gm. The library of mutants was screened for loss of cellular levels of cyclic GMP using 96-well ACE EIA Kit (Cayman™). Briefly, strains were inoculated into microtiter wells containing NYGB medium using a Qpix robot (Genetix™), equal amounts of bacterial cells as adjusted by determination of optical density at 600 nm (OD600) were harvested by centrifugation, and lysed. The cyclic GMP level present in the bacterial lysates for each well was determined using the ACE EIA Kit (Cayman™).

#### Identification of transposon insertion sites.

Genomic DNA was extracted from transposon mutants of interest as previously described (McCarthy *et al*, 2010). The nucleotide sequence flanking the transposon insertion site was amplified by PCR as previously described (McCarthy *et al*, 2010) using the primers: Rnd1-TnM (5'-GTGAGCGGATAACAATTTTCACACAG-3'), and Rnd2-TNm (5'-ACAGGAAACAGGACTCTAGAGG-3'). Amplicons were sequenced using the TnM specific primer: TnMseq (5'-CACCCAGCTTTCTGTACAC-3'). Sequence data generated were examined with blastn, blastx (<http://www.ncbi.nlm.nih.gov/BLAST/>) software.

#### Construction of insertion and deletion mutant strains.

In-frame deletion of selected genes was carried out using pK18*mobsac* as described previously for *rpfG* (An *et al*, 2013; Slater *et al*, 2000). Mutants were also created by the disruption of genes with

the use of the plasmid pK18*mob* as described previously for *Xcc* (Dow *et al*, 2003).

### **Cellular quantification of cyclic nucleotides.**

Cyclic GMP or Cyclic di-GMP was quantified as described previously (Marden *et al*, 2011; Ryan *et al*, 2009) in bacterial strains grown to an OD at 600 nm of 0.8 in NYGB medium.

### **Site-directed mutagenesis of CYC or cNMP domain from XC\_250 or XC\_0249.**

Site-directed mutagenesis was used to introduce the alanine alterations using mutagenic PCR in a two-step protocol as previously reported (Ryan *et al*, 2010; Ryan *et al*, 2012). In the first round of PCR, two separate reactions were carried out with one of a pair of primers of complementary sequence carrying the desired alteration and the His-tagged domain of interest cloned into pLAFR3 as template. The products of the first round of PCR were used as templates for a second round of PCR (Mutagenic primer sequences will be supplied upon request).

### **Cyclic nucleotide cyclase assays**

Adenylyl and guanylyl cyclase reactions were undertaken in 100  $\mu$ l reactions containing 0.5  $\mu$ g  $\mu$ l<sup>-1</sup> purified protein of interest, 20 mM Tris (pH 8.0), 100 mM NaCl, 0.5 mM ATP or GTP and 10 mM MnCl<sub>2</sub> or MgCl<sub>2</sub>. Reactions were incubated at 25°C, stopped by heating at 75°C for 10 min and then clarified by centrifugation at 15 000 r.p.m. for 10 min. High-pressure liquid chromatography was used to separate nucleotides as described by (Marden *et al*, 2011; Ryan *et al*, 2010). The identity of nucleotides was confirmed by mass spectrometry.

Cyclic di-GMP cyclase reactions were carried out using a standard enzymatic reaction mixture (total volume, 200  $\mu$ l) that contained 5  $\mu$ M enzyme in 50 mM Tris-HCl (pH 7.6), 10 mM MgCl<sub>2</sub>, 0.5 mM EDTA, and 50 mM NaCl. The reaction was started by the addition of 50  $\mu$ l of GTP (final concentration, 150  $\mu$ M) to the pre-warmed reaction mixture and was carried out for 60 min. The mixture was immediately placed in a boiling water bath for 3 min, followed by centrifugation at 15,000 x g for 2 min. The supernatant was filtered through a 0.22 $\mu$ m-pore-size filter and analyzed by high-pressure liquid chromatography (Ryan *et al*, 2006; Ryan *et al*, 2010). The identity of cyclic di-GMP as product was confirmed by mass spectrometry.

### **Construction of protein expression vectors and protein purification.**

PCR fragments coding for the domains from the *Xcc* proteins [XC\_0249 or XC\_0250] were cloned into pET28a for expression as His-tagged fusions as described previously (Ryan *et al*, 2010; Ryan *et al*, 2012). All the plasmid constructs were confirmed by DNA sequencing. His-tagged proteins were purified by nickel affinity chromatography as described previously (Ryan *et al*, 2010). In all cases protein concentration was assayed using NanoDrop®. Purified proteins were stored at -20°C.

### **Isothermal titration calorimetry (ITC) experiments.**

The association constant (K<sub>a</sub>) between wild-type XC\_0249 full-length protein and its variants with cyclic GMP or cyclic AMP was measured using an ITC200 calorimeter (MicroCal). Titrations of XC\_0249 with cyclic GMP or cyclic AMP were carried out at 25°C in an assay buffer containing 20 mM Tris-Cl (pH 8.0), 80 mM NaCl. Samples of XC\_0249 for ITC measurements were dialyzed extensively against the assay buffer overnight. The concentration of wild-type XC\_0249 and its variants in the cell was 0.05 mM and that of cyclic GMP in the syringe was 0.75 mM. One  $\mu$ l of cyclic GMP was injected into the cell with a time lag of 180 s between each injection for a total of 30 times. ITC data were analyzed by integrating heat exchange amount after subtracting background dilution heat from the apparent values. Data fitting was based on a one-site binding

model using the commercial package provided (Origin) to obtain the values of  $K_a$ ,  $\Delta H$  and  $\Delta S$ . The  $\Delta G$  value was derived by calculating using the equation  $\Delta G = \Delta H - T\Delta S$ . These values were listed in Supplementary Table S2.

### **RNA extraction and preparation.**

Three independent cultures of each selected *Xanthomonas* strain were sub-cultured and grown to logarithmic phase (0.7-0.8 OD<sub>600</sub>) at 30°C in NYGB broth without selection. 800 µl of RNA protect (Qiagen) was added to 400 µl culture and incubated at room temperature for 5 min. Cell suspensions were centrifuged, the supernatant was discarded, and pellets were stored at -80°C. After thawing, 100 µl TE-lysozyme (400 µg/ml) was added and samples were incubated at room temperature. Total RNA was isolated using the RNeasy Mini Kit (Qiagen) whereby cells were homogenised utilising a 20-gauge needle and syringe. Samples were treated with DNase (Ambion) according to manufacturer's instructions and the removal of DNA contamination was confirmed by PCR.

### **RNAseq: cDNA library construction and sequencing.**

RNA quality was assessed on a Bioanalyser PicoChip (Agilent) and RNA quantity was measured using the RNA assay on QuBit fluorometer (Life Technologies). Ribosomal RNA was depleted with Ribo-Zero™ rRNA Removal Kits for Gram-Negative Bacteria (Epicentre). The percentage of rRNA contamination was checked on a Bioanalyser PicoChip (Agilent).

The rRNA-depleted sample was processed using the Illumina TruSeq RNA v2 sample preparation kit. In brief, the sample was chemically fragmented to ~200nt in length and the cleaved RNA fragments were primed with random hexamers into first strand cDNA using reverse transcriptase and random primers. The RNA template was removed and a replacement strand was synthesised to generate ds cDNA. The ds cDNA was end repaired to remove the overhangs from the fragmentation into blunt ends. A single 'A' nucleotide was added to the 3' ends on the blunt fragments, which is complementary to a 'T' nucleotide on the 3' end of the Illumina adapters. At this stage, adapters containing 6 nt barcodes were used for different samples to allow the pooling of multiple samples together. The resulted barcoded samples were enriched by 10 cycles of PCR to amplify the amount of DNA in the library. The final cDNA libraries were sequenced on an Illumina HiSeq2000 as per manufacturer's instructions.

### **Computational analysis.**

Cluster generation was performed using the Illumina cBot and the cDNA fragments were sequenced on the Illumina HiSeq2000 following a standard protocol. The fluorescent images were processed to sequences using the Pipeline Analysis software 1.8 (Illumina). Raw sequence data obtained in Illumina FASTQ-format were first separated by their barcode sequence by comparing the first 6 bases with the expected barcode sequences. Successfully detected barcodes were removed from the sequence leaving reads of 30 nt in length, while reads containing no recognisable barcode sequence were discarded.

#### *Read mapping, annotation and quantification of transcript levels*

Reads for each sample were aligned to the *Xanthomonas campestris* pv *campestris* 8004 NC\_007086 assembly (Integrated Microbial Genomes (IMG) database, taxon object ID 637000343) using Bowtie version 0.12.7 with default parameters. Transcript abundance was determined for the gene models annotated in the IMG *Xanthomonas campestris* pv *campestris* 8004 genome release IMG/W 2.0 using the Bowtie RNA-Seq BAM alignments for each of the

samples. To estimate the level of transcription for each gene, the number of reads that mapped within each annotated coding sequence (CDS) was determined.

#### *Analysis of differential expression*

Differential expression was assessed using Cufflinks (1). Cufflinks reports an expression value for each transcript and gene in Fragments Per Kilobase of exon model per Million mapped fragments (FPKM). A test statistic is also calculated which, after Benjamini-Hochberg correction for multiple-testing was used to determine significant changes in expression between each pair of samples (false discovery rate 0.05).

#### **Quantitative Real-time PCR.**

Quantitative RT-PCRs were used to validate RNA-Seq data. Reverse transcription PCR was achieved using a cDNA synthesis kit (Promega) according to the manufacturer's instructions. Specific RT-PCR primers were used to amplify central fragments of approximately 200 bp in length from different genes. Semi-quantitative RT-PCRs were completed using 250 ng/μl cDNA template and PCR Mastermix (Promega) for 24–36 cycles. For qRT-PCRs, quantification of gene expression and melting curve analysis were completed using a LightCycler (Roche) and Platinum SYBR Green qPCR Supermix-UDG (Invitrogen) was used according to manufacturer's instructions. The constitutively expressed housing keeping gene, *16S rRNA* was used as a reference to standardize all samples and replicates.

#### **Virulence assays.**

The virulence of *Xcc* to Chinese radish was estimated after bacteria were introduced into the leaves by leaf clipping as previously detailed (An *et al*, 2013; Dow *et al*, 2003; Ryan *et al*, 2007). Bacteria grown overnight in NYGB medium were washed and re-suspended in water to an OD at 600 nm of 0.001. For leaf clipping the last completely expanded leaf was cut with scissors dipped in the bacterial suspensions. Thirty leaves were inoculated for each strain tested. Lesion length was measured 14 days after inoculation. Each strain was tested in at least four separate experiments.

#### **Biofilm Assays.**

Biofilm was assessed by attachment to glass and was determined by crystal violet staining. Log-phase-grown bacteria were diluted to OD<sub>600 nm</sub> = 0.02 in L media broth, and 5 ml was incubated at 30°C for 24 h in 14-ml glass tubes. After gently pouring off the media, bacterial pellicles were washed twice with water and were then stained with 0.1% crystal violet. Tubes were washed and rinsed with water until all unbound dye was removed (Lu *et al*, 2012). Three independent assays were carried out for each strain.

#### **Protein expression and structure analysis.**

##### *Cloning, expression, and purification of native and variant proteins*

The coding region corresponding to the different XC\_0249 constructs were PCR amplified directly from the plant pathogen *Xcc* using the forward primers 5'-CAATGCTGAATTCATGACCTGCCATACCTCCAACGG-3' and 5'-CAATGCTGAATTCATGACCTGCCATACCTCCAACG-3' and the reverse primers 5'-TCCAATGCTCGAGTTAGCTGTTGTCCA ACGGCAATG-3' and 5'-TCCAATGCTCGAGGATCAGCAATTGCTCGTTATT-3', for the XC\_0249 full length and XC\_0249 cNMP domain constructs, respectively. The PCR products exhibited correct sizes in agarose gel electrophoresis and were further confirmed by DNA sequencing. The PCR products and the pET vector were both treated with XhoI and EcoRI restriction enzymes in 37°C separately. The

treated insert and vector were then mixed and incubated at 16°C overnight for ligation using T4 DNA ligase (Roche).

The final constructs of the XC\_0249FL and XC0249NMP(1-150) targets contain a C-terminal His6-tag and expression is under the control of a T7 promoter. Overexpression of these target proteins was induced by the addition of IPTG to a final concentration of 0.5 mM at 20°C for 20 h. Proteins were then purified by immobilized metal affinity chromatography (IMAC) on a nickel column (Sigma). For crystallization, the XC0249NMP(1-150) target was further purified on a Superdex 75 column (AKTA, Pharmacia).

#### *Crystallization of the XC\_0249 cNMP domain bound to cyclic GMP*

For crystallization, the native proteins were concentrated to 5 mg/mL in 20 mM Tris-HCl (pH 8.0), 80 mM NaCl using an Amicon Ultra-10 (Millipore). Screening for crystallization conditions was performed by using a sitting-drop vapor diffusion method in 96-well plates (Hampton Research) at 4°C by mixing 0.3 µl protein solution with 0.3 µl reagent solution in the presence of 0.8 mM cyclic GMP. Initial screens including the Hampton Clear Strategy Screen 1, the Structure Screens 1 and 2, a systematic PEG-pH screen, and a PEG/Ion screen were carried out using the PHENIX RE crystallization workstation (Rigaku).

Rod-like crystals of XC\_0249 cNMP domain/cyclic GMP complex appeared from a reservoir solution comprising 0.2M ammonium acetate, 0.1M sodium acetate, pH 4.6, 21% w/v PEG 4000 in 2 days. Crystals suitable for diffraction experiments were grown by mixing 1.6 µl protein solution with 0.8 µl reagent solution at 25 °C. The Se-Met labelled XC\_0249 cNMP domain/cyclic GMP complex was crystallized under the same conditions.

#### *Data collection and refinement*

Crystals were flash-cooled at 100°K under a stream of cold nitrogen. X-ray diffraction data were collected using the National Synchrotron Radiation Research Center (NSRRC) beamline 13C1 in Taiwan. The diffraction of the XC\_0249 cNMP/cyclic GMP complex reaches a resolution of 2.1 Å, with a space group of P31. The unit cell dimensions are  $a=b=48.64$ ,  $c=118.09$ ,  $\alpha=\beta=90^\circ$ , and  $\gamma=120^\circ$ . The data for the Se-Met-labelled XC\_0249cNMP/cyclic GMP crystals were collected in a similar way to a resolution of 3.2 Å.

The collected data were indexed and integrated using the HKL-2000 software. Autosol in the Phenix suite was used to solve the phase by using the single anomalous dispersion (SAD) approach. Autobuild was used to obtain the initial structure of SeMet-XC\_0249 cNMP, which was manually adjusted using the Mifit (2010.10) program. The co-ordinate refinement was then iteratively carried out using the CNS program and Phenix\_refine subroutine. The final SeMet-XC\_0249 cNMP structure was then used as the template for molecular replacement in the Phenix suite to refine against the native diffraction data of the XC\_0249 cNMP. An apparent electron density map was observed in the active site region of the 2Fo-Fc map, and a cyclic GMP molecule was successfully fit into this patch with some adjustment. A unbiased Fo-Fc map was generated at a s value of 2.0 to reveal the presence of cyclic GMP in the XC\_0249 cNMP crystal structure. The detailed X-ray diffraction data and the refinement results were listed in Supplementary Table S3.

## Supplementary References

An SQ, Febrer M, McCarthy Y, Tang DJ, Clissold L, Kaithakotti G, Swarbreck D, Tang JL, Rogers J, Dow JM, Ryan RP (2013) High-resolution transcriptional analysis of the regulatory influence of cell-to-cell signalling reveals novel genes that contribute to *Xanthomonas* phytopathogenesis *Mol Microbiol* (In Press).

Dow JM, Crossman L, Findlay K, He YQ, Feng JX, Tang JL (2003) Biofilm dispersal in *Xanthomonas campestris* is controlled by cell-cell signaling and is required for full virulence to plants. *Proc Nat Acad Sci USA* **100**: 10995-11000.

Leong SA, Ditta GS, Helinski DR (1982) Heme-biosynthesis in Rhizobium - Identification of a cloned gene coding for delta-aminolevulinic-acid synthetase from *Rhizobium meliloti*. *J Biol Chem* **257**: 8724-8730.

Lu X-H, An S-Q, Tang D-J, McCarthy Y, Tang J-L, Dow JM, Ryan RP (2012) RsmA regulates biofilm formation in *Xanthomonas campestris* through a regulatory network involving cyclic di-GMP and the Clp transcription factor. *PLoS One* **7**: e12.

Marden JN, Dong Q, Roychowdhury S, Berleman JE, Bauer CE (2011) Cyclic GMP controls *Rhodospirillum centenum* cyst development. *Mol Microbiol* **79**: 600-615.

McCarthy Y, Yang L, Twomey KB, Sass A, Tolker-Nielsen T, Mahenthiralingam E, Dow JM, Ryan RP (2010) A sensor kinase recognizing the cell-cell signal BDSF (cis-2-dodecenoic acid) regulates virulence in Burkholderia cenocepacia. *Mol Microbiol* **77**: 1220-1236.

Qian W, *et al.* (2005) Comparative and functional genomic analyses of the pathogenicity of phytopathogen *Xanthomonas campestris* pv. *campestris*. *Genome Research* **15**: 757-767.

Ryan RP, Fouhy Y, Lucey JF, Crossman LC, Spiro S, He YW, Zhang LH, Heeb S, Camara M, Williams P, Dow JM (2006) Cell-cell signaling in *Xanthomonas campestris* involves an HD-GYP domain protein that functions in cyclic di-GMP turnover. *Proceedings of the National Academy of Sciences of the United States of America* **103**: 6712-6717

Ryan RP, Fouhy Y, Lucey JF, Jiang B-L, He Y-Q, Feng J-X, Tang J-L, Dow JM (2007) Cyclic di-GMP signalling in the virulence and environmental adaptation of *Xanthomonas campestris*. *Mol Microbiol* **63**: 429-442.

Ryan RP, Lucey J, O'Donovan K, McCarthy Y, Yang L, Tolker-Nielsen T, Dow JM (2009) HD-GYP domain proteins regulate biofilm formation and virulence in *Pseudomonas aeruginosa*. *Environ Microbiol* **11**: 1126-1136.

Ryan RP, McCarthy Y, Andrade M, Farah CS, Armitage JP, Dow JM (2010) Cell-cell signal-dependent dynamic interactions between HD-GYP and GGDEF domain proteins mediate virulence in *Xanthomonas campestris*. *Proc Nat Acad Sci USA* **107**: 5989-5994.

Ryan RP, McCarthy Y, Kiely PA, O'Connor R, Farah CS, Armitage JP, Dow JM (2012) Dynamic complex formation between HD-GYP, GGDEF and PilZ domain proteins regulates motility in *Xanthomonas campestris*. *Mol Microbiol* **86**: 557-567.

Sambrook J, Fritsch EF, Maniatis T (1989) *Molecular Cloning: A Laboratory Manual*. Cold Spring Harbor Laboratory Press, NY, Vol. 1, 2, 3.

Schafer A, *et al.* (1994) Small mobilizable multipurpose cloning vectors derived from the *Escherhia coli* plasmids PK18 and PK19 - Selection of defined deletions in the chromosome of *Corynebacterium glutamicum*. *Gene* **145**: 69-73.

Slater H, Alvarez-Morales A, Barber CE, Daniels MJ, Dow JM (2000) A two-component system involving an HD-GYP domain protein links cell-cell signalling to pathogenicity gene expression in *Xanthomonas campestris*. *Mole Microbiol* **38**: 986-1003.

Staskawicz B, Dahlbeck D, Keen N, & Napoli C (1987) Molecular characterization of cloned avirulence genes from RACE-0 and RACE-0 of *Pseudomonas sringae* pv. *glycinea*. *J Bacteriol* **169**: 5789-5794.

Tang DJ, *et al.* (2005) The zinc uptake regulator zur is essential for the full virulence of *Xanthomonas campestris* pv. *campestris*. *Mol Plant Microbe Interact* **18**: 652-658.

Turner P, Barber C, Daniels M (1985) Evidence for clustered pathogenicity genes in *Xanthomonas campestris* pv *campestris*. *Mol Gen Genet* **199**: 338-343.

## Supplementary Figure and Table Legends

**Supplementary Figure 1.** (A). Amino acid sequence alignment of the cyclase domain of XC\_0250 with cyclase domains of proteins from diverse bacteria including the guanylyl cyclase of *Rhodospirillum centenum*. Abbreviations are: MS: *Mycobacterium smegmatis* Mycsm\_05238; BJ: *Bradyrhizobium japonicum* BJ6T\_75600; BS: *Burkholderia terrae* WQE\_40989 and RC: *Rhodospirillum centenum* RC1\_3783. Amino acids predicted to be involved in the formation of the active-site of XC\_0250 are boxed in red (D41, D71, L73, A150, L157, A161). (B). Contribution of XC\_0250 to cyclic GMP levels in *Xcc*. Deletion of XC\_0250 leads to a reduced level of cyclic GMP in *Xcc* that can be restored to wild-type levels by complementation with a clone (pXC\_0250) expressing the full-length XC\_0250 protein. Alanine or serine substitutions in residues predicted to be critical for enzymatic activity of XC\_0250 abolish restoration (D41A, D71A, L73A, A150S, L157A, A161S). Values given are the mean and standard deviation of triplicate measurements (three biological and three technical replicates). (C). The guanylate cyclase activity of XC\_0250 is required for biofilm formation. Variants in the CYC domain of XC\_0250 that can no longer function as a guanylate cyclase (D41A, D71A) are unable to restore biofilm formation to the XC\_0250 mutant. Values given are the mean and standard deviation of triplicate measurements (three biological and three technical replicates).

**Supplementary Figure 2.** Domain organization and cyclic GMP binding by XC\_0249. (A). Domain analysis using Pfam and SMART (<http://smart.embl-heidelberg.de/>) shows that XC\_0249 comprises a cNMP domain attached to a GGDEF domain. (B). Binding of radiolabelled cyclic GMP by full-length XC\_0249, the isolated cNMP and GGDEF domains of XC\_0249 and different variants of the full length XC\_0249. All reactions contained 50  $\mu\text{M}$  [ $^{32}\text{P}$ ]-cyclic GMP. Data given as counts per minute (cpm) are the means and standard deviation of triplicate measurements (three biological and three technical replicates).

**Supplementary Figure 3.** Binding of cyclic GMP to variants of the cNMP domain of XC\_0249 as measured by isothermal titration calorimetry. Variants F73A, E90A, H98A, N145A and E146A showed considerably reduced affinity for cyclic GMP, consistent with the role of these residues in cyclic GMP binding.

**Supplementary Figure 4.** The *in vitro* DGC (diguanylate cyclase) activity of XC\_0249 is enhanced by the addition of cyclic GMP at 1  $\mu\text{M}$ . The GTP substrate and cyclic di-GMP product were separated by HPLC. (A). A variant in the cNMP of XC\_0249 that no longer bound cyclic GMP (F73A) was unresponsive to the addition of cyclic GMP (A). A variant in the cNMP of



XC\_0249 that no longer bound cyclic GMP (F73A, E90A) was unresponsive to the addition of cyclic GMP and less effective than the wild-type in restoring biofilm formation to the *XC\_0249* mutant (B). Values given are the mean and standard deviation of triplicate measurements (three biological and three technical replicates).

**Supplementary Figure 5.** Model of the regulation of biofilm formation and virulence in *Xcc* by cyclic GMP and cyclic di-GMP. The guanylyl cyclase coded by *XC\_0250* synthesizes cyclic GMP in response to as yet unknown signal. The cNMP-binding domain of XC\_0249 binds and is activated by cyclic GMP, resulting in stimulation of diguanylyl cyclase (GGDEF) domain. This results in the modulation of cyclic di-GMP levels and has downstream effects on biofilm formation and virulence gene expression. It is important to note that cyclic GMP may also be perceived by as yet unknown effectors that contribute to the phenotypes described.

**Supplementary Figure 6.** Amino acid sequence alignment of the XC\_0249 and *E. coli* CRP (*EcCRP*). (A). The determined secondary structural elements for the cNMP are shown above and below the sequence. The cNMP sequence of *EcCRP* is followed by a helix-turn-helix DNA binding-domain, while that of XC\_0249 is followed by a GGDEF domain. Residues essential for binding cyclic GMP and cAMP are highlighted in either green (identical residues) or red (non-identical residues). The two residues N145 and E146 of XC\_0249 form strong H-bonds with the guanine base of cyclic GMP and are indicated by a red arrow. (B). The monomer structure of the cNMP domain of XC\_0249.

**Supplementary Figure 7.** Figure S7. A model showing the superimposition of the cNMP domain of XC\_0249 (colored in red) and that of *E. coli* CRP (1G6N) (colored in marine). The central  $\alpha$ C helices superimpose/fit strongly while the cNMP binding  $\beta$ -barrel domains deviate due to the binding of different cyclic-mononucleotide. (A). An expanded view of these regions show that the cyclic GMP (the carbons colored in magenta) adopts a *syn*-conformation (the G-H8 and ribose-H1' atoms are located in the same side), which is different to the *anti*-conformation exhibited by cyclic AMP (carbons colored in cyan) in the *E. coli* CRP complex structure (B). It is also important to note that strong H-binding occurs between the cyclic GMP G-O6 and G-2NH<sub>2</sub> with the side chain atoms of Asn144 in the  $\alpha$ C helix and Glu145' in the  $\alpha$ C' helix, respectively. In contrast, in the *E. coli* CRP-cAMP complex, the cyclic AMP A-6NH<sub>2</sub> binds with the Ser428 in the  $\alpha$ C helix and S428' in the  $\alpha$ C' helix.

**Supplementary Table 1.** List of genes differentially expressed in *XC\_0249* and *XC\_0250* mutant backgrounds compared to wild-type. Significantly differentially expressed genes (fold change  $\geq 4$ ) were determined using Cufflinks after Benjamini-Hochberg correction. The fold change is the ratio of mutant fragments per kilobase of exon per million fragments mapped (FPKM) to wild-type FPKM. The genes were ranked by the size of their fold change in expression.

**Supplementary Table 2.** Binding constants of *XC\_0249* variants for different nucleotides as determined by isothermal titration calorimetry.

**Supplementary Table 3.** Statistics of data collection and structural refinement of *XC\_0249* cNMP domain bound to cyclic GMP complex

**Supplementary Table 4.** Strains and plasmids used in this study.

A)

```

XC0250 -----MTIRSHARKEASSEAIQAPRLRLLLLTDLCDSTALVERIGDNA
MS -----TGHQAEVADDRVLATVLFVDIVESTRLAADMGRD
BJ YAKAAIARRRNHRYEPLAGAIVLRRRRPAAGSTELKRALATILIVDVGSTAKAALGDVR
BS -----SSEYDRVLATVLFVDIVGSTDKAVSLGDR
RC -----DRRMATVLFADIVGSTRMVAADPED
      : * * : * * :

XC0250 AAALFREDHDLVVKLQQHWRGRLIDRS-DGILLLFDRPDELGFDLDYARGLKLLGETRD
MS -----WHALLDAHDAVRSQRLARFRGREVNTSODGILATFDGPPORAIRSAMAIRDAVQALG----
BJ -----WTKIMGHYYAAVRKELKSSRGKEVTTTDCG-----AVRTL-----
BS -----WSDLLECHHNVRRELERFRGREIATTCGILASFDGPARAVRCACAI SRDVQSLG----
RC -----AQERLDRVLRTL SAHVERYGGTVCQTLDCGILAVFGAPNSLEDHAVRACFAADAIVR---
      : : * * * :

XC0250 LVVRRARQGLHVGEVLTWRNSDEAVSIGAKPLEVEGLAKPTAARLMSMARPGQILL SAVAE
MS -----IEVRAGLHTGECEVRGD-----DIGGIAVHIGARVSALARPNDVIVSSTLR
BJ -----LEIRVGLHAGEYTVSGT-----EAVGLAFHIGTRVAAKARAGEVIVSSAVK
BS -----IEVRAGVHTGECEVIGN-----GLGGIAVHIGARIAGLAQTGEVIVSATVK
RC -----EARSGMRDADPVAVRVG-----LSSGEILWDSGALNRQDRAPAVGRTVIVLAAKLQ
      . * * : : : : : : : * : : * : : :

XC0250 SLTHRAARELGTPSERLLWKSHGRWRFKGMPTPMEIYEVGEVGLTPLR
MS -----DLVIG-SGIEFEDRGAHQKGVPGEWHLFAVVSA-----
BJ -----ELLAPQSGIRLREHGVHQLKGVPERWRLWRVEG-----
BS -----DLVAG-SALQFQDRGVYSLKGVPGDWRLFAVDH-----
RC -----QTAPENGVRLEPTAVAAQDWAELALV-----
      . : . : . :

```

B)

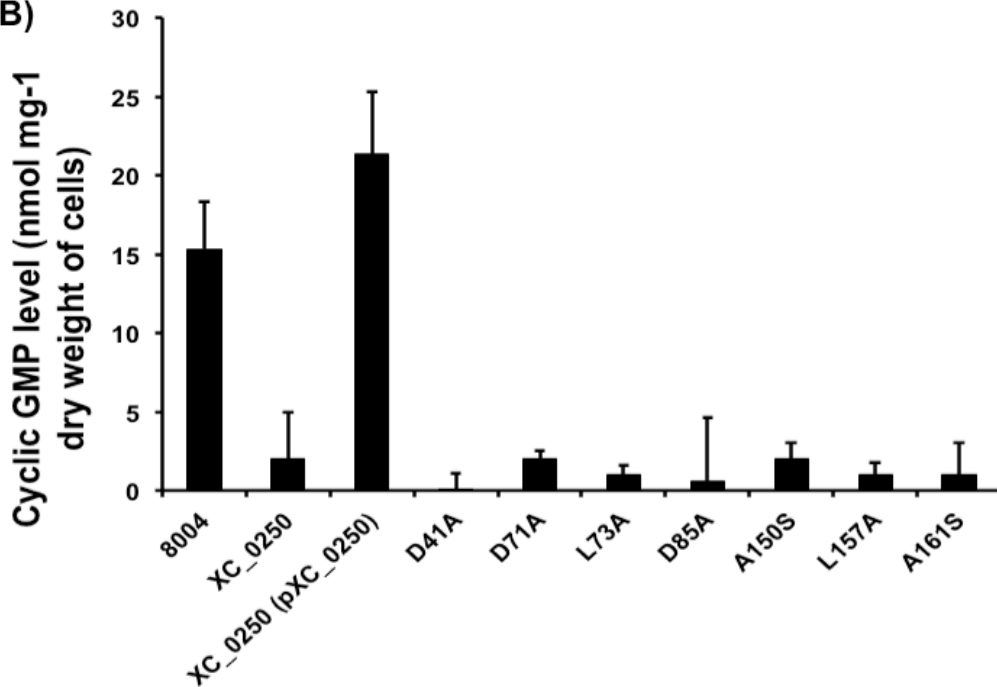

C)

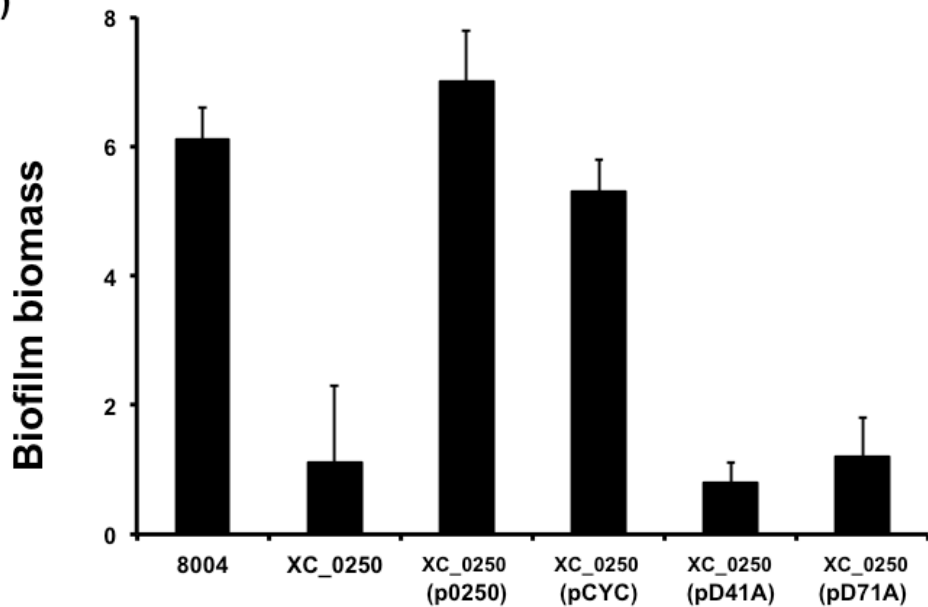

A)

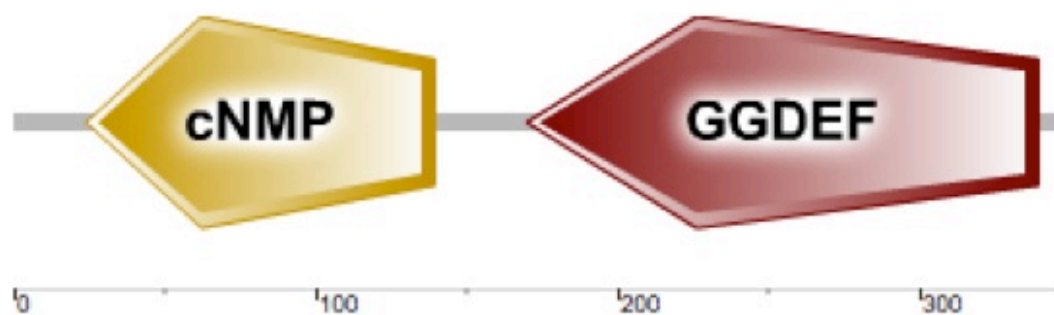

B)

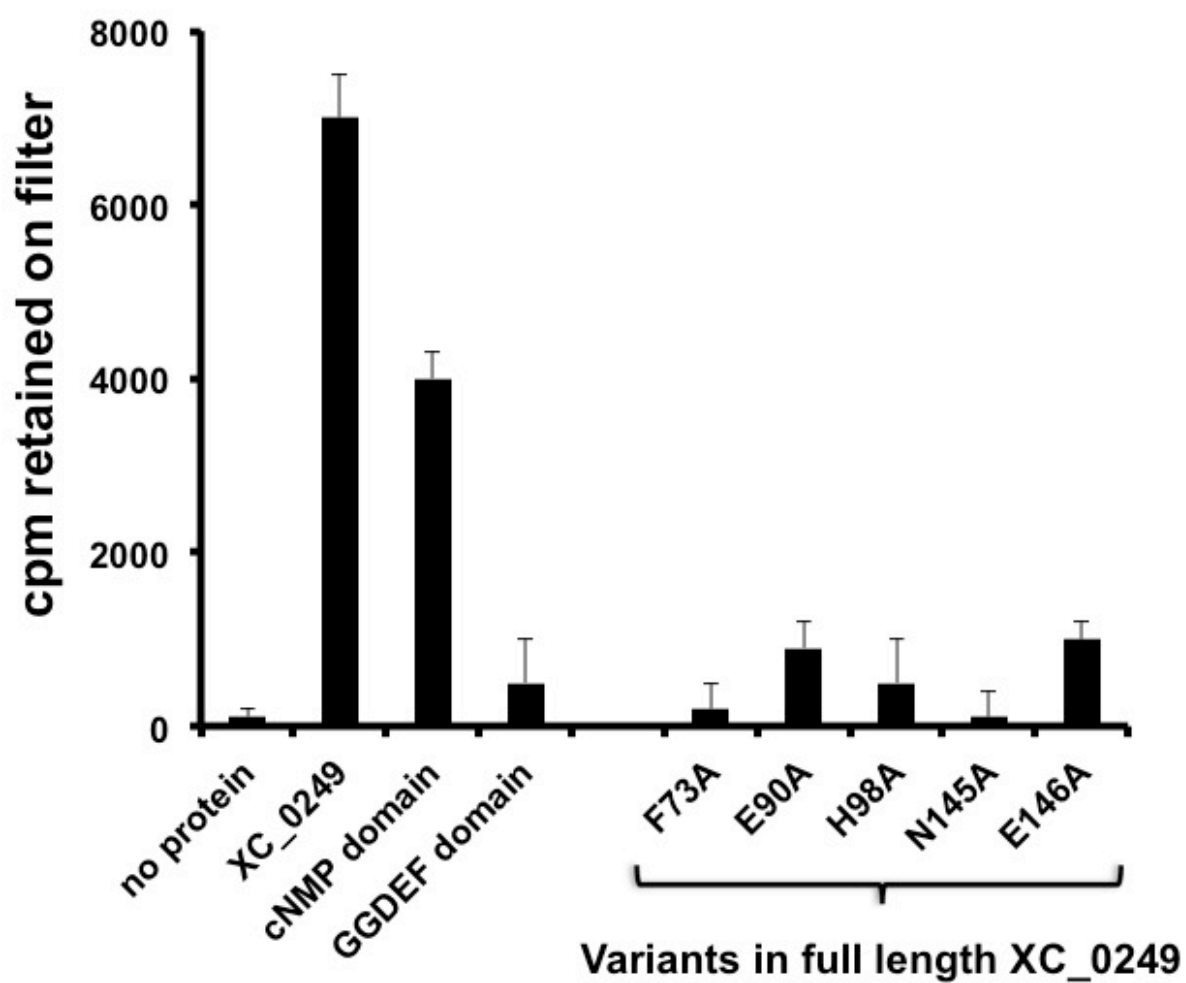

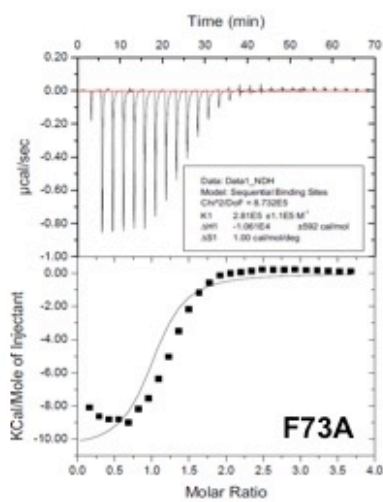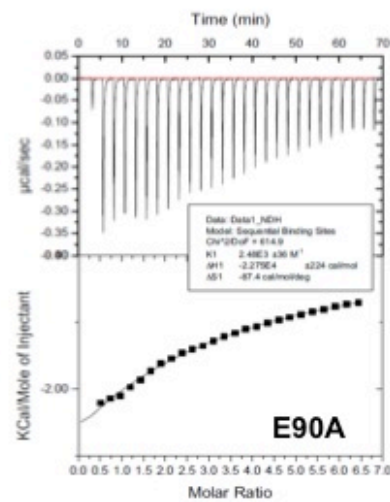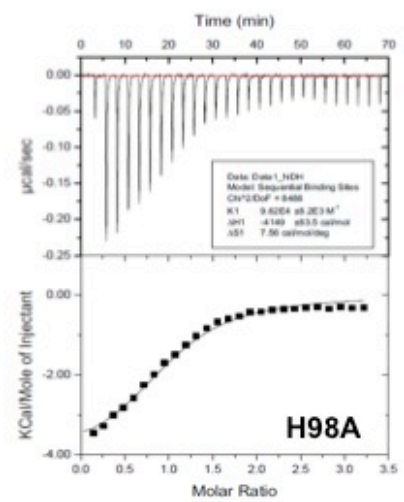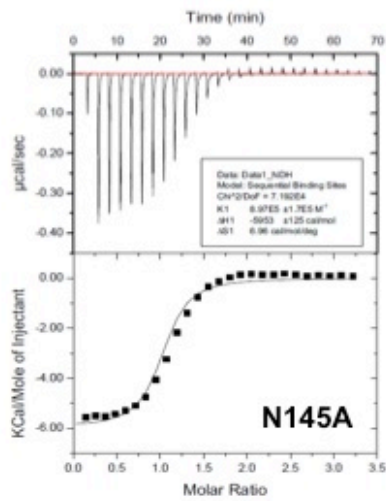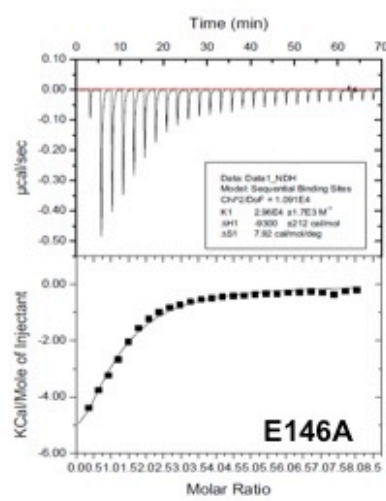

**A)**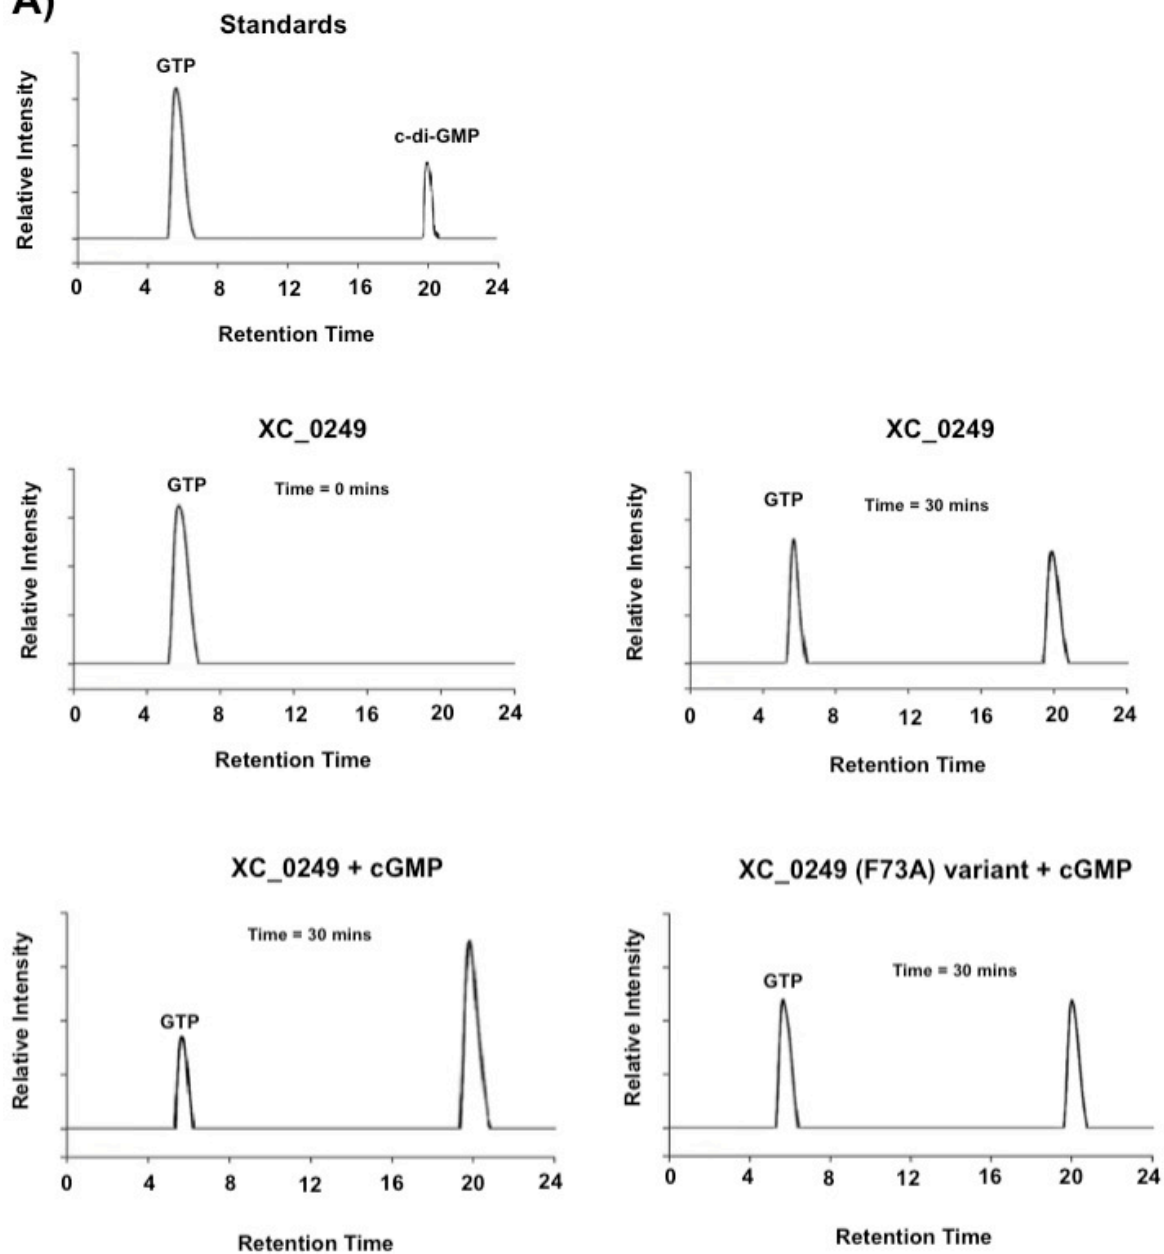**B)**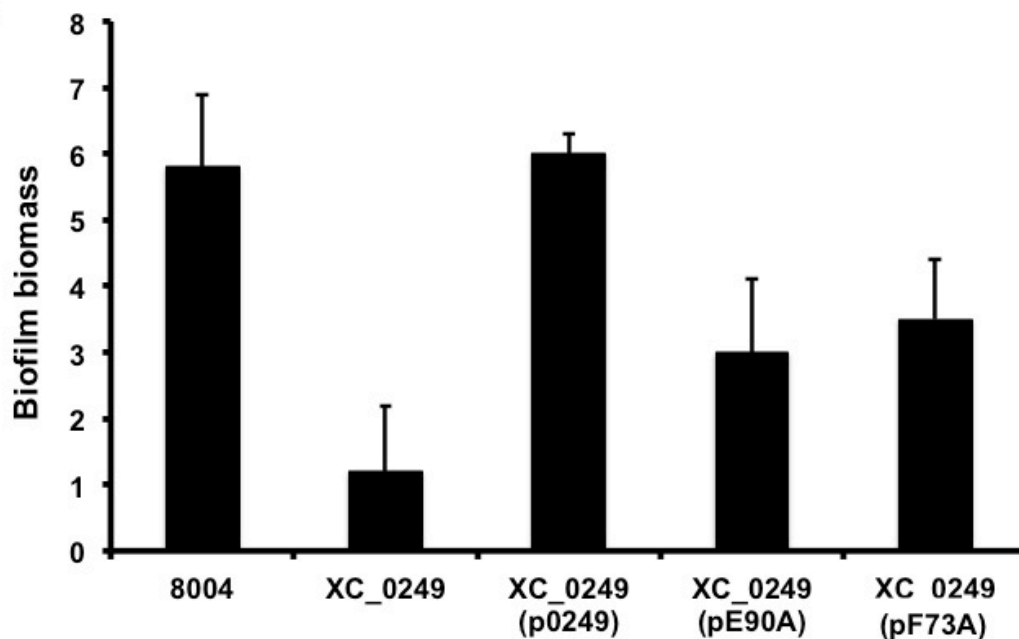

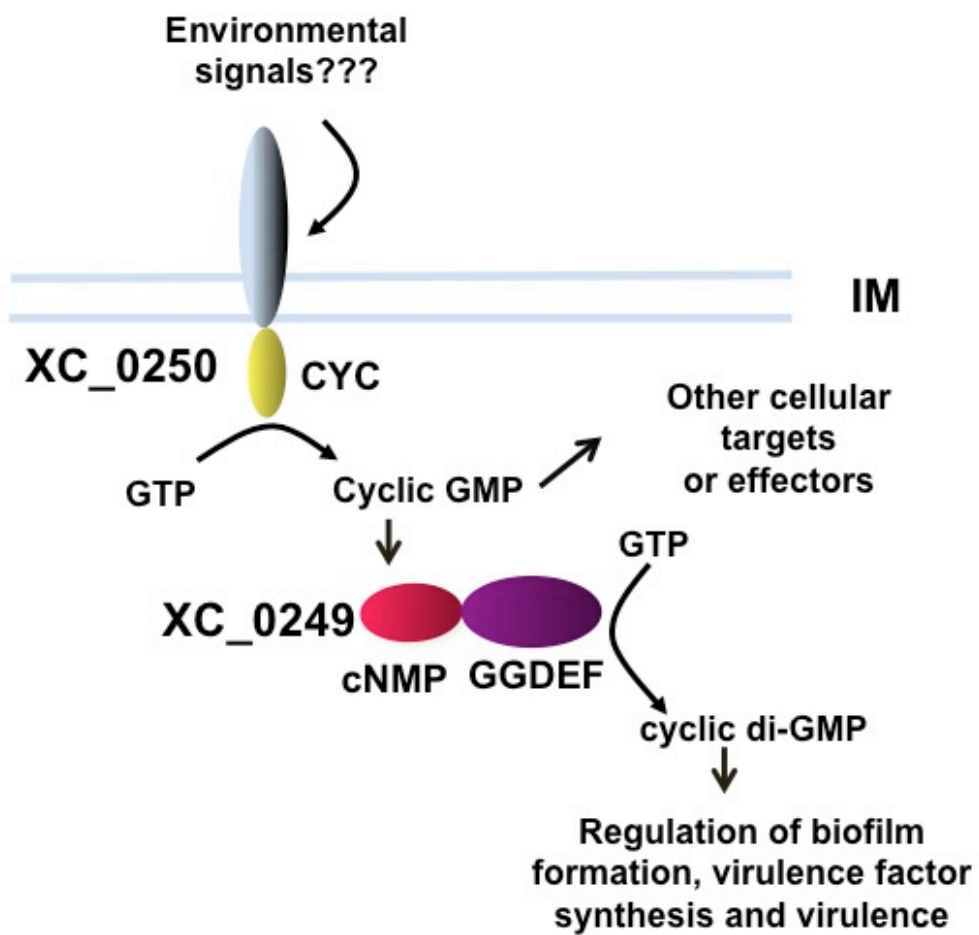

A).

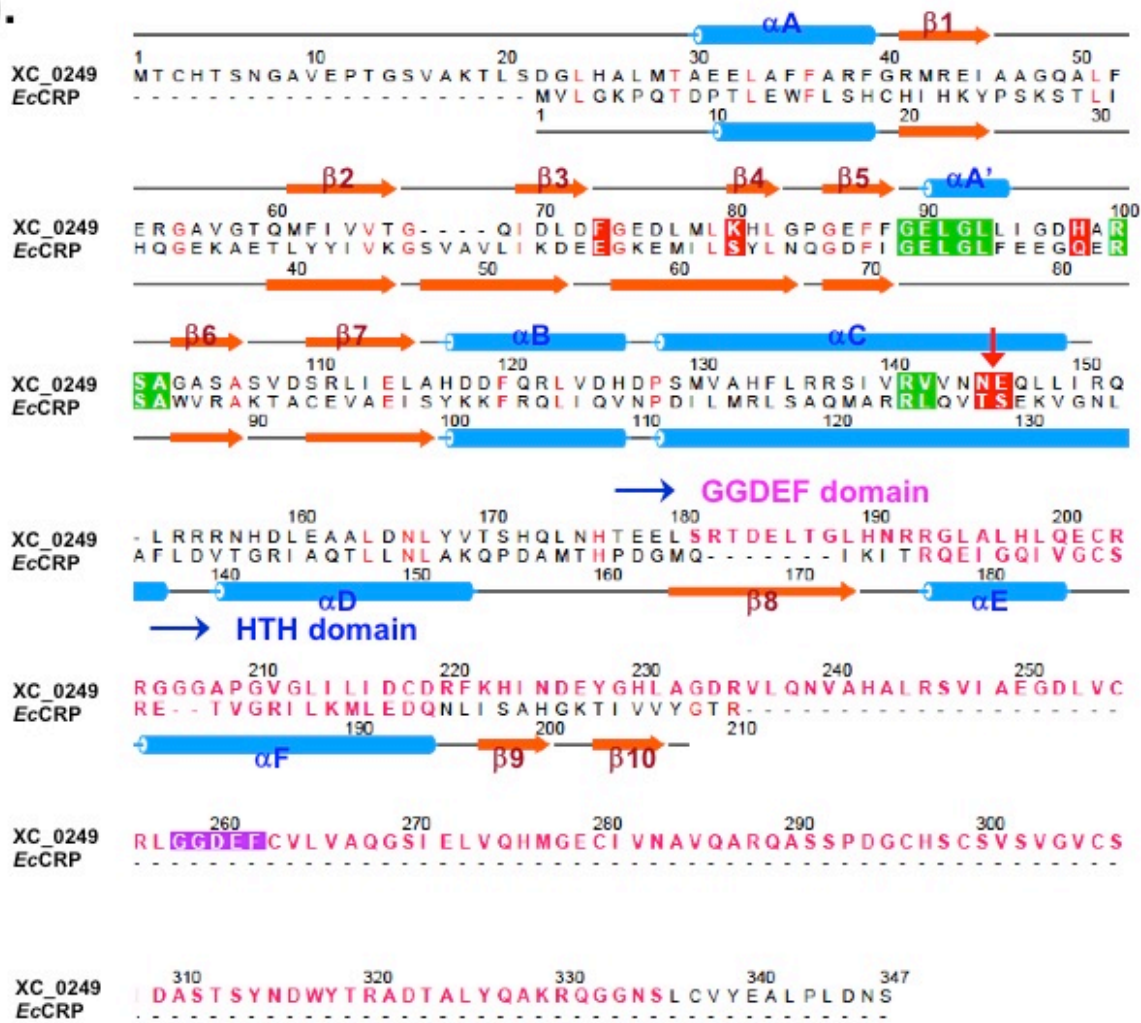

B).

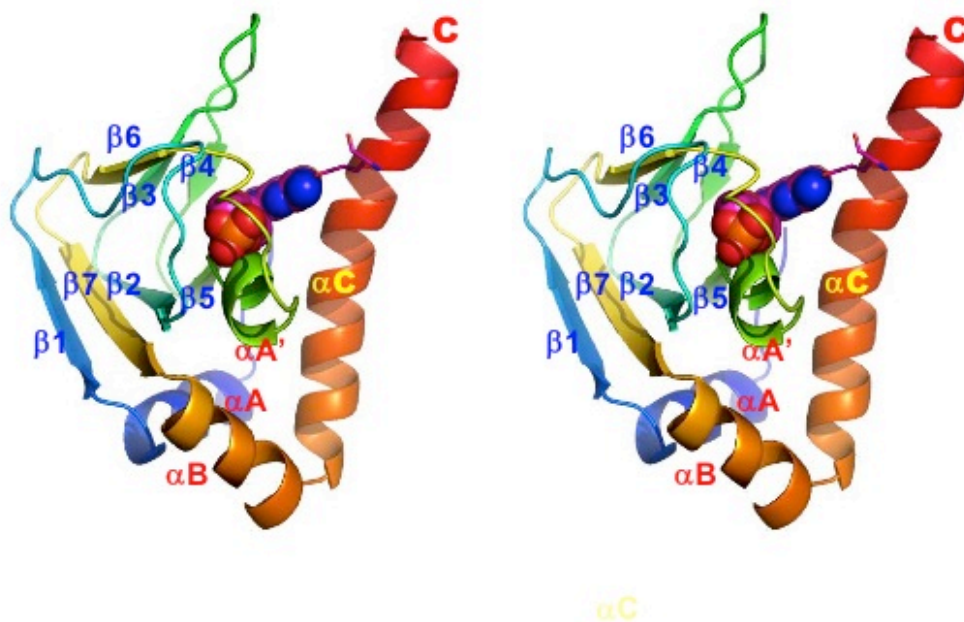



A)

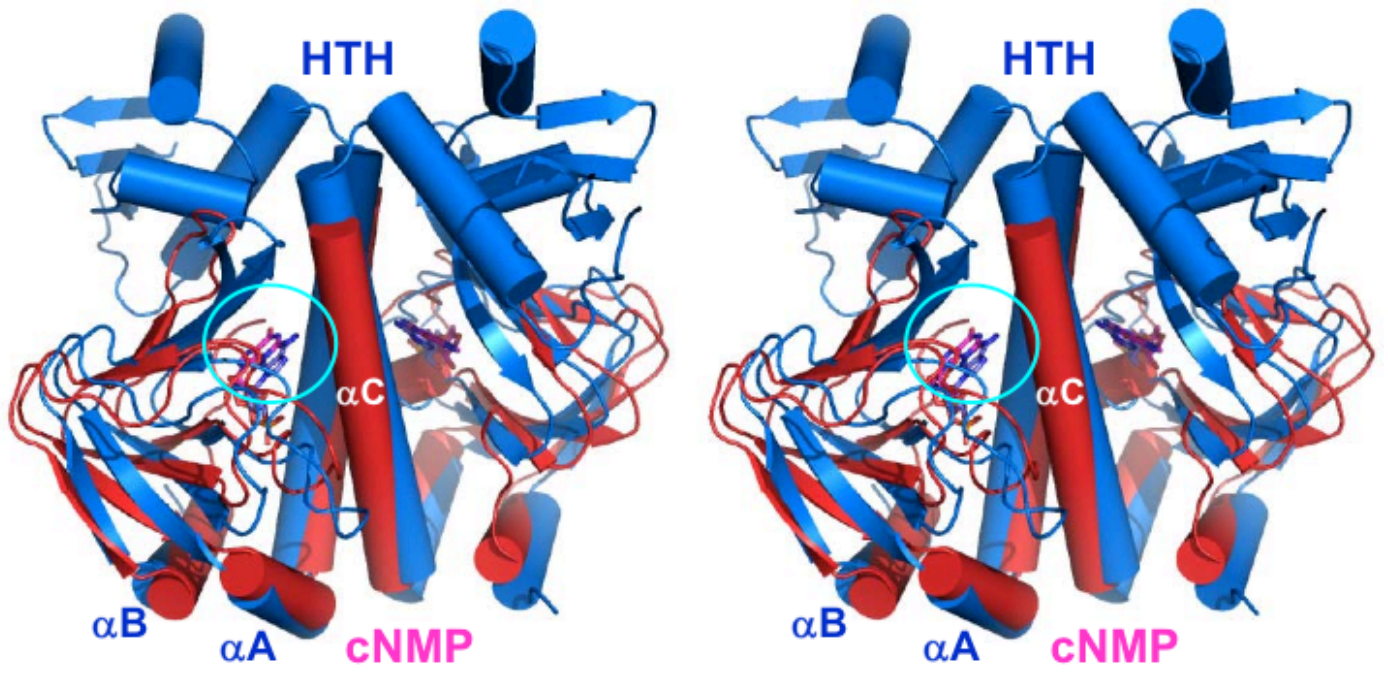

B)

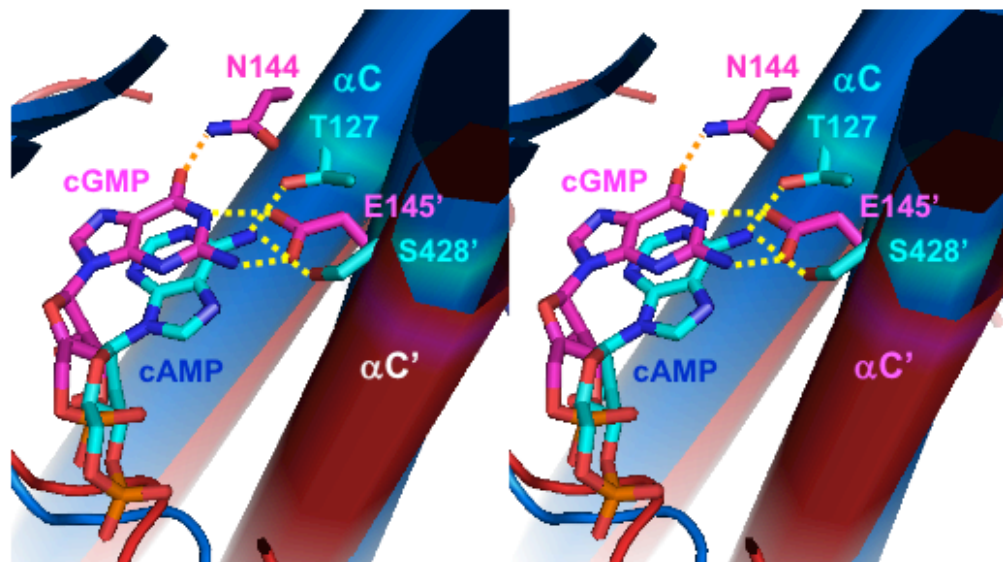

**Supplementary Table 1.** List of genes differentially expressed in *XC\_0249* and *XC\_0250* mutant backgrounds compared to wild-type. Significantly differentially expressed genes (fold change  $\geq 4$ ) were determined using Cufflinks after Benjamini-Hochberg correction. The fold change is the ratio of mutant fragments per kilobase of exon per million fragments mapped (FPKM) to wild-type FPKM. The genes were ranked by the size of their fold change in expression.

| Entry <sup>a</sup> | Function <sup>b</sup>                                        | <i>XC_0249</i> <sup>c</sup> | <i>XC_0250</i> <sup>c</sup> |
|--------------------|--------------------------------------------------------------|-----------------------------|-----------------------------|
| XC_0026            | cellulase                                                    | down                        |                             |
| XC_0027            | cellulase                                                    | down                        |                             |
| XC_0094            | TldD protein                                                 | up                          | up                          |
| XC_0117            | conserved hypothetical protein                               | down                        | down                        |
| XC_0129            | conserved hypothetical protein                               |                             | down                        |
| XC_0130            | Imidazoleglycerol-phosphate synthase                         |                             | up                          |
| XC_0131            | conserved hypothetical protein                               |                             | down                        |
| XC_0132            | deoxycytidylate deaminase                                    |                             | down                        |
| XC_0136            | RhsD protein truncated                                       |                             | down                        |
| XC_0223            | conserved hypothetical protein                               |                             | down                        |
| XC_0224            | methyltransferase                                            |                             | down                        |
| XC_0225            | DNA or RNA helicases of superfamily II                       |                             | down                        |
| XC_0230            | conserved hypothetical protein                               |                             | down                        |
| XC_0286            | chemotaxis protein                                           | up                          | up                          |
| XC_0323            | AlcR transcriptional activator and the CreA global repressor |                             | up                          |
| XC_0324            | insect-type dehydrogenase                                    |                             | up                          |
| XC_0331            | AbiD phage protein-like                                      |                             | up                          |
| XC_0343            | Permeases of the major facilitator superfamily               |                             | down                        |
| XC_0344            | periplasmic serine protease, DO/DeqQ famil                   |                             | down                        |
| XC_0347            | lipoprotein                                                  |                             | up                          |
| XC_0350            | putative membrane protein                                    |                             | down                        |
| XC_0351            | conserved hypothetical protein                               |                             | down                        |
| XC_0412            | IS1404 transposase                                           | up                          | up                          |
| XC_0475            | conserved hypothetical protein                               |                             | down                        |
| XC_0476            | type I restriction-modification system endonuclease          |                             | down                        |
| XC_0477            | putative restriction modification system specificity subunit |                             | down                        |
| XC_0478            | anticodon nuclease                                           |                             | down                        |

|         |                                                         |      |      |
|---------|---------------------------------------------------------|------|------|
| XC_0479 | DNA-binding protein                                     |      | down |
| XC_0480 | type I site-specific deoxyribonuclease                  |      | down |
| XC_0543 | TonB-dependent outer membrane receptor                  | down | down |
| XC_0544 | persistence to inhibition of murein or DNA biosynthesis |      | up   |
| XC_0585 | conserved hypothetical protein                          |      | down |
| XC_0586 | putative lipase                                         |      | down |
| XC_0637 | histidine kinase/response regulator hybrid protein      | up   | up   |
| XC_0638 | chemotaxis protein                                      | down | down |
| XC_0639 | cellulase                                               | down | down |
| XC_0710 | Peptidoglycan-binding domain 1 protein                  |      | down |
| XC_0783 | cellulase S                                             | down | down |
| XC_0817 | hypothetical protein                                    |      | up   |
| XC_0849 | TonB-dependent receptor                                 |      | down |
| XC_0856 | conserved hypothetical protein                          |      | down |
| XC_0857 | Lipase (class 3).conserved hypothetical protein         |      | down |
| XC_0861 | conserved hypothetical protein                          |      | up   |
| XC_0863 | putative lipoprotein                                    |      | down |
| XC_0864 | VirB6 protein                                           |      | down |
| XC_0865 | Lipase (class 3)                                        |      | down |
| XC_0866 | putative exported protein                               |      | down |
| XC_0867 | putative lipoprotein                                    |      | down |
| XC_0868 | VirB6 protein                                           |      | down |
| XC_0870 | type IV secretion system protein                        |      | down |
| XC_0871 | putative secreted protein                               |      | down |
| XC_0914 | conserved hypothetical protein                          |      | down |
| XC_0915 | TonB-like protein//putative BlaR1 antirepressor         |      | down |
| XC_0916 | transcriptional regulator blaI family                   |      | down |
| XC_0922 | reductase                                               |      | down |
| XC_0923 | transcriptional regulator                               |      | up   |
| XC_0924 | outer membrane receptor for ferric iron uptake          |      | up   |
| XC_0925 | outer membrane receptor for ferric iron uptake          |      | up   |

|         |                                                           |      |      |
|---------|-----------------------------------------------------------|------|------|
| XC_0967 | HopPtoH; conserved hypothetical protein                   |      | up   |
| XC_1004 | TonB-dependent receptor                                   | down | down |
| XC_1018 | phage-related integrase                                   |      | down |
| XC_1019 | conserved hypothetical protein                            | down | down |
| XC_1021 | Helix-turn-helix XRE-family like proteins                 |      | down |
| XC_1023 | conserved hypothetical protein                            |      | down |
| XC_1027 | VirB6 protein                                             |      | down |
| XC_1028 | conserved hypothetical protein                            |      | down |
| XC_1029 | conserved hypothetical protein                            |      | up   |
| XC_1030 | conserved hypothetical protein                            |      | down |
| XC_1036 | GGDEFdomain containing protein                            |      | up   |
| XC_1037 | conserved hypothetical protein                            |      | down |
| XC_1038 | conserved hypothetical protein                            |      | up   |
| XC_1039 | conserved hypothetical protein                            |      | down |
| XC_1040 | conserved hypothetical protein                            |      | down |
| XC_1041 | conserved hypothetical protein; membrane protein          |      | down |
| XC_1042 | conserved hypothetical protein                            |      | up   |
| XC_1057 | fimbrial assembly protein                                 |      | down |
| XC_1058 | pilA; type IV pilus assembly protein PilA                 |      | down |
| XC_1059 | pilA; type IV pilus assembly protein PilA                 |      | down |
| XC_1201 | RebB protein                                              |      | up   |
| XC_1213 | Xanthomonas outer protein D-XCV/cysteine protease         |      | down |
| XC_1291 | endoproteinase Arg-C                                      | down | down |
| XC_1292 | endoproteinase Arg-C                                      | down | down |
| XC_1300 | quinol oxidase, subunit I                                 | up   | up   |
| XC_1301 | quinol oxidase, subunit II                                | up   | up   |
| XC_1379 | conserved hypothetical protein                            |      | down |
| XC_1380 | McrB-related protein                                      |      | down |
| XC_1381 | McrC, McrBC 5-methylcytosine restriction system component |      | down |
| XC_1391 | conserved hypothetical protein                            | down | down |
| XC_1410 | response regulator for chemotaxis                         | up   | up   |

|         |                                                         |      |      |
|---------|---------------------------------------------------------|------|------|
| XC_1411 | response regulator                                      | up   | up   |
| XC_1413 | chemotaxis protein                                      | up   | up   |
| XC_1414 | chemotaxis histidine protein kinase                     | up   | up   |
| XC_1415 | putative anti-anti-sigma factor                         | up   | up   |
| XC_1422 | cysteine protease                                       |      | up   |
| XC_1423 | inner membrane protein                                  | up   | up   |
| XC_1441 | conserved hypothetical protein                          |      | up   |
| XC_1442 | extracellular serine protease                           |      | up   |
| XC_1451 | TonB-dependent receptor                                 | down | down |
| XC_1515 | extracellular protease                                  | down | down |
| XC_1549 | hypothetical protein-XCV                                |      | down |
| XC_1621 | pre-pilin like leader sequence                          |      | down |
| XC_1622 | pre-pilin leader sequence                               |      | down |
| XC_1623 | PilW-related protein;Tfp pilus assembly protein         |      | down |
| XC_1624 | PilX related protein                                    |      | down |
| XC_1625 | Tfp pilus adhesin; type IV pilus assembly protein PilY1 |      | down |
| XC_1626 | type IV pilin                                           |      | down |
| XC_1631 | putative secreted protein                               |      | up   |
| XC_1632 | VirB8 protein                                           |      | down |
| XC_1633 | VirB9 protein                                           |      | down |
| XC_1634 | VirB10 protein                                          |      | down |
| XC_1635 | VirB11 protein                                          |      | down |
| XC_1636 | VirB1 protein                                           |      | down |
| XC_1637 | VirB2 protein                                           |      | down |
| XC_1638 | VirB3 protein                                           |      | down |
| XC_1639 | VirB4 protein                                           |      | down |
| XC_1640 | hypothetical,ISD1 transposase                           |      | down |
| XC_1719 | hypothetical protein                                    |      | down |
| XC_1732 | Mannosyltransferase OCH1 and related enzymes            | up   | up   |
| XC_1880 | gamma-glutamyl phosphate reductase                      |      | down |
| XC_1945 | transport protein                                       |      | down |

|         |                                                             |      |      |
|---------|-------------------------------------------------------------|------|------|
| XC_2009 | Helix-turn-helix motif                                      |      | down |
| XC_2011 | IS1477 transposase                                          | up   | up   |
| XC_2013 | sensor kinase                                               |      | down |
| XC_2014 | conserved hypothetical protein                              |      | up   |
| XC_2015 | TriD protein                                                |      | down |
| XC_2016 | VirB6 protein                                               |      | down |
| XC_2017 | conserved hypothetical protein                              |      | down |
| XC_2018 | putative secreted protein-XCV                               |      | down |
| XC_2019 | Lipase (class 3).conserved hypothetical protein             |      | down |
| XC_2044 | conserved hypothetical protein                              |      | down |
| XC_2055 | putative secreted protein-Xcv                               |      | down |
| XC_2056 | conserved hypothetical protein                              |      | up   |
| XC_2058 | conserved hypothetical protein                              |      | down |
| XC_2087 | tannase precursor                                           | down | down |
| XC_2088 | conserved hypothetical protein                              | down | down |
| XC_2135 | conserved hypothetical protein                              | up   | up   |
| XC_2223 | chemotaxis protein                                          | down | down |
| XC_2224 | putative secreted protein                                   | up   | up   |
| XC_2230 | conserved hypothetical protein                              | down | down |
| XC_2231 | flagellar protein/negative regulator of flagellin synthesis | down | down |
| XC_2232 | flagellar protein                                           | down | down |
| XC_2234 | flagellar protein/flagellar basal body protein              | down | down |
| XC_2235 | flagellar biosynthesis                                      | down | down |
| XC_2236 | flagellar protein/flagellar hook capping protein            | down | down |
| XC_2237 | flagellar biosynthesis, flagellar hook protein              | down | down |
| XC_2238 | flagellar protein/flagella basal body rod protein           | down | down |
| XC_2239 | flagellar biosynthesis                                      | down | down |
| XC_2240 | flagellar L-ring protein                                    | down | down |
| XC_2241 | flagellar protein                                           | down | down |
| XC_2242 | flagellar protein                                           | down | down |
| XC_2243 | flagellar protein                                           | down | down |

|         |                                                        |      |      |
|---------|--------------------------------------------------------|------|------|
| XC_2244 | flagellar protein                                      | down | down |
| XC_2245 | flagellar protein                                      | down | down |
| XC_2246 | flagellar protein                                      | down | down |
| XC_2247 | flagellar protein/flagellin-specific chaperone         | down | down |
| XC_2251 | RNA polymerase sigma-54 factor                         | down | down |
| XC_2259 | flagellar protein                                      | down | down |
| XC_2260 | flagellar protein                                      | down | down |
| XC_2261 | flagellar protein                                      | down | down |
| XC_2262 | flagellar protein                                      | down | down |
| XC_2264 | flagellar FliJ protein                                 | down | down |
| XC_2265 | flagellar protein                                      | down | down |
| XC_2266 | flagellar biosynthesis protein                         | down | down |
| XC_2267 | flagellar protein                                      | down | down |
| XC_2269 | flagellar protein                                      | down | down |
| XC_2272 | flagellar biosynthesis                                 | down | down |
| XC_2277 | flagellar protein                                      | down | down |
| XC_2278 | flagellar biosynthetic protein FlhA                    | down | down |
| XC_2279 | flagellar biosynthetic protein,has a GDP-binding motif | down | down |
| XC_2280 | flagellar biosynthesis switch protein                  | down | down |
| XC_2281 | RNA polymerase sigma factor                            | down | down |
| XC_2282 | chemotaxis protein                                     | down | down |
| XC_2283 | chemotaxis related protein                             | down | down |
| XC_2284 | chemotaxis related protein                             | down | down |
| XC_2299 | chromosome partitioning protein                        | down | down |
| XC_2300 | chemotaxis protein                                     | down | down |
| XC_2301 | putative anti-sigma factor antagonist                  | down | down |
| XC_2302 | chemotaxis response regulator                          | down | down |
| XC_2314 | chemotaxis protein                                     | up   | up   |
| XC_2318 | chemotaxis protein                                     | down | down |
| XC_2319 | conserved hypothetical protein                         | down | down |
| XC_2320 | chemotaxis protein                                     | down | down |

|         |                                           |      |      |
|---------|-------------------------------------------|------|------|
| XC_2323 | glutamate methylesterase                  | up   | up   |
| XC_2342 | regulatory protein rpfl                   | up   | up   |
| XC_2394 | IS1477 transposase                        | up   | up   |
| XC_2418 | hypothetical protein                      | down | down |
| XC_2419 | hypothetical protein                      | down | down |
| XC_2424 | hypothetical protein                      | down | down |
| XC_2438 | plasmid-related protein                   | down | down |
| XC_2456 | two-component system sensor protein       | up   | up   |
| XC_2458 | mannan endo-1,4-beta-mannosidase          | down | down |
| XC_2623 | IS1477 transposase                        | up   | up   |
| XC_2708 | ABC transporter phosphate binding protein | up   | up   |
| XC_2830 | conserved hypothetical protein            | down | down |
| XC_2848 | asparagine synthase B                     | down | down |
| XC_2857 | proteinU                                  | down | down |
| XC_2858 | pili assembly chaperone                   | down | down |
| XC_2859 | outer membrane usher protein FasD         | down | down |
| XC_2860 | probable lipoprotein signal peptide       | down | down |
| XC_2979 | enoyl-CoA hydratase                       | down | down |
| XC_2980 | acyl-CoA dehydrogenase                    | down | down |
| XC_2981 | methylmalonate-semialdehyde dehydrogenase | down | down |
| XC_3214 | citrate synthase 2                        | down | down |
| XC_3215 | carboxyphosphoenolpyruvate phosphonmutase | down | down |
| XC_3280 | peptidyl-Asp metalloendopeptidase         | down | down |
| XC_3487 | alpha-amylase                             | down | down |
| XC_3540 | conserved hypothetical protein            | up   | up   |
| XC_3553 | endo-1,4-beta-galactanases                | up   | up   |
| XC_3554 | putative membrane protein                 | up   | up   |
| XC_3555 | putative glycosyltransferase              | up   | up   |
| XC_3556 | putative secreted protein                 | up   | up   |
| XC_3591 | pectate lyase                             | down | down |
| XC_3661 | conserved hypothetical protein            | up   | up   |



|         |                                      |      |      |
|---------|--------------------------------------|------|------|
| XC_3762 | cyanide insensitive terminal oxidase | down | down |
| XC_3763 | cyanide insensitive terminal oxidase | down | down |
| XC_3766 | oxidoreductase                       | up   | up   |
| XC_3885 | dehydrogenase                        | down | down |
| XC_4034 | conserved hypothetical protein       | down | down |
| XC_4035 | conserved hypothetical protein       | down | down |
| XC_4121 | 4-oxalomesaconate hydratase          | up   | up   |
| XC_4152 | cytochrome C biogenesis protein      | down | down |
| XC_4153 | putative secreted protein            | down | down |
| XC_4291 | microcystin dependent protein        | down | down |
| XC_4293 | microcystin dependent protein        | down | down |
|         |                                      |      |      |

a: Annotation according to Qian *et al*, (2005).

b: Predicated function based on best BLAST hits searching the bacterial genome database.

c: Fold change in gene expression in selected mutant compared to wild-type strain - log2 scaled fold change expression.

**Supplementary Table 2.** Binding constants of XC\_0249 variants for different nucleotides as determined by isothermal titration calorimetry.

| <b>XC_0249 protein and variants</b> | <b>Ka / Kd</b>                           | <b>Percentage activity<sup>#</sup></b> | <b>ΔH<br/>Kcal/mol</b> | <b>ΔS<br/>cal/mol/deg</b> | <b>ΔG<br/>Kcal/mol</b> |
|-------------------------------------|------------------------------------------|----------------------------------------|------------------------|---------------------------|------------------------|
| WT-cyclic GMP                       | $3.65 \times 10^6 / 2.74 \times 10^{-7}$ | 100                                    | -9.46                  | -9.51                     | -6.63                  |
| WT-cyclic AMP                       | $7.13 \times 10^4 / 1.40 \times 10^{-5}$ | 1.9                                    | -5.44                  | 6.08                      | -7.25                  |
| F73A                                | $2.81 \times 10^5 / 3.56 \times 10^{-6}$ | 7.6                                    | -10.6                  | 1                         | -10.9                  |
| E90A                                | $2.48 \times 10^3 / 4.03 \times 10^{-4}$ | 0.7                                    | -22.75                 | -87.4                     | 3.3                    |
| H98A                                | $9.62 \times 10^4 / 1.04 \times 10^{-5}$ | 2.6                                    | -4.15                  | 7.56                      | -6.4                   |
| N145A                               | $8.97 \times 10^5 / 1.11 \times 10^{-6}$ | 24.5                                   | -5.95                  | 6.96                      | -8.02                  |
| E146A                               | $2.96 \times 10^4 / 3.38 \times 10^{-5}$ | 0.8                                    | -9.3                   | 7.92                      | -11.66                 |

**Supplementary Table 3.** Statistics of data collection and structural refinement of XC\_0249 cNMP domain bound to cyclic GMP complex.

|                                                        | <b>Se-Met substituted</b>                            | <b>Native</b>                                        |
|--------------------------------------------------------|------------------------------------------------------|------------------------------------------------------|
| Beamline                                               | NSRRC BL13B1                                         | NSRRC BL13C1                                         |
| Wavelength (Å)                                         | 0.97888, Peak <sup>†</sup>                           | 1.00000                                              |
| Space group                                            | P3 <sub>1</sub>                                      | P3 <sub>1</sub>                                      |
| Unit cell parameters                                   | a=b=49.03, c=115.89<br>$\alpha=\beta=90, \gamma=120$ | a=b=48.64, c=118.09<br>$\alpha=\beta=90, \gamma=120$ |
| Resolution range (Å)                                   | 50-3.21 (3.32-3.21)*                                 | 30-2.12 (2.20-2.12)*                                 |
| Total observations                                     | 45740                                                | 54437                                                |
| Unique observations                                    | 5075                                                 | 17702                                                |
| Redundancy                                             | 9.0 (7.5)*                                           | 3.1 (3.0)*                                           |
| Completeness (%)                                       | 98.6 (94.2)*                                         | 99.7 (97.1)*                                         |
| R <sub>merge</sub> <sup>‡</sup> (%)                    | 10.2 (30.8)*                                         | 4.0 (32.0)*                                          |
| I/ $\sigma$ (I)                                        | 18.876 (6.212)*                                      | 18.464 (2.955)*                                      |
| R <sub>free</sub> test set size (%)                    |                                                      | 5                                                    |
| <b>Refinement statistics</b>                           |                                                      |                                                      |
| R <sub>cryst</sub> /R <sub>free</sub> <sup>‡</sup> (%) |                                                      | 22.54%/26.31%                                        |
| <b>Number of atoms</b>                                 |                                                      |                                                      |
| Protein residues                                       |                                                      | 260                                                  |
| c-GMP                                                  |                                                      | 2                                                    |
| Water                                                  |                                                      | 121                                                  |
| <b>Average B-factors (Å<sup>2</sup>)</b>               |                                                      |                                                      |
| Protein residues                                       |                                                      | 38.3                                                 |
| c-GMP                                                  |                                                      | 40.1                                                 |
| Water                                                  |                                                      | 42.3                                                 |
| <b>r.m.s deviation from ideal geometry</b>             |                                                      |                                                      |
| Bonds lengths (Å)                                      |                                                      | 0.0085                                               |
| Bonds angles (°)                                       |                                                      | 0.16                                                 |
| <b>Ramachandran plot (%)</b>                           |                                                      |                                                      |
| Residues in most favorable regions                     |                                                      | 94.0                                                 |
| Residues in additionally allowed regions               |                                                      | 3.9                                                  |
| Residues in generously allowed regions                 |                                                      | 2.1                                                  |

\* Values in parenthesis are for the outermost shell while the preceding values refer to all data.

<sup>¶</sup>  $R_{\text{free}}$  is the same as  $R_{\text{cryst}}$  but for 5.0 % of the total reflections chosen at random and omitted from refinement.

<sup>†</sup> Friedel mates were considered separately as unique reflections in the calculation of these statistics.

$$\text{II } R_{\text{merge}} = \frac{\sum_{hkl} \sum_i |I_i(hkl) - \langle I(hkl) \rangle|}{\sum_{hkl} \sum_i I_i(hkl)}.$$

**Supplementary Table 4.** Strains and plasmids used in this study.

| Strain or plasmid                    | Relevant characteristics                                                          | Source or Reference              |
|--------------------------------------|-----------------------------------------------------------------------------------|----------------------------------|
| <i>Escherichia coli</i>              |                                                                                   |                                  |
| <i>Escherichia coli</i> DH5 $\alpha$ | Cloning strain that supports blue/white screening of colonies,<br>recA1 and endA1 | Invitrogen™                      |
| <i>Escherichia coli</i> BL21(DE3)    | F- ompT gal dcm lon hsdSB(rB- mB-)<br>$\lambda$ (DE3) pLysS(CmR)                  | Promega™                         |
| <b>Plasmids and clones</b>           |                                                                                   |                                  |
| pRK2073                              | Helper plasmid, Sp <sup>R</sup>                                                   | Leong <i>et al</i> ,<br>(1982)   |
| pK18mobkan                           | <i>lacZ</i> $\alpha$ , Km <sup>R</sup>                                            | Schäfer <i>et al</i> ,<br>(1994) |
| pK18mobsacB                          | <i>sacB</i> , <i>lacZ</i> $\alpha$ , Km <sup>R</sup> allelic exchange<br>vector   | Tang <i>et al</i> ,<br>(2005)    |
| pLAFR1::Tn5gusA5                     | Broad-host-range IncP2, cosmid,<br>Km <sup>R</sup> , Tc <sup>R</sup>              | Schäfer <i>et al</i> ,<br>(1994) |
| pLAFR3                               | Broad-host-range IncP2, cosmid, Tc <sup>R</sup>                                   | Staskawicz <i>et al</i> , (1984) |
| pPH1JI                               | Sp <sup>R</sup> , Gm <sup>R</sup>                                                 | Turner <i>et al</i> ,<br>(1985)  |
| pCR-Blunt-TOPO                       | Cloning vector for blunt ended PCR<br>products                                    | Invitrogen™                      |
| pET-28a                              | T7 promoter, His tag, lacI, Km <sup>R</sup>                                       | Novagen™                         |
| <i>Xanthomonas campestris</i>        |                                                                                   |                                  |
| Xcc 8004                             | Rif <sup>R</sup>                                                                  | Qian <i>et al</i> ,<br>(2005)    |

|                                                            |                                                                                                                                                      |            |
|------------------------------------------------------------|------------------------------------------------------------------------------------------------------------------------------------------------------|------------|
| <b>Mutants derived from 8004</b>                           | <b>All Rif<sup>R</sup></b>                                                                                                                           |            |
| <b>In-frame unmarked deletion mutants</b>                  |                                                                                                                                                      |            |
| <i>XC_0249</i>                                             | <i>XC_0249</i> in frame deletion mutant                                                                                                              | This study |
| <i>XC_0250</i>                                             | <i>XC_0250</i> in frame deletion mutant,                                                                                                             | This study |
|                                                            |                                                                                                                                                      |            |
| <b>Transposon-insertion mutants</b>                        | <b>All Rif<sup>R</sup>, Gm<sup>R</sup></b>                                                                                                           |            |
| <i>XC_0250-MT</i>                                          | As 8004, but <i>XC_0250::Tn5gusA5</i>                                                                                                                | This study |
| <i>XC_0250-MT</i>                                          | As 8004, but <i>XC_0250::Tn5gusA5</i>                                                                                                                | This study |
|                                                            |                                                                                                                                                      |            |
| <b>Site directed variants of the CYC domain of XC_0250</b> |                                                                                                                                                      |            |
| D41A                                                       | D41A variant introduced by site-directed mutagenesis in the CYC domain with a N-terminal His tag cloned into pLAFR3 or without His tag into pET-28a  | This study |
| D71A                                                       | D71A variant introduced by site-directed mutagenesis in the CYC domain with a N-terminal His tag cloned into pLAFR3 or without His tag into pET-28a  | This study |
| L73A                                                       | D73A variant introduced by site-directed mutagenesis in the CYC domain with a N-terminal His tag cloned into pLAFR3 or without His tag into pET-28a  | This study |
| L157A                                                      | D157A variant introduced by site-directed mutagenesis in the CYC domain with a N-terminal His tag cloned into pLAFR3 or without His tag into pET-28a | This study |
| <b>Site directed variants of the</b>                       |                                                                                                                                                      |            |

| <b>cNMP domain of XC_0249</b> |                                                                                                                                                              |            |
|-------------------------------|--------------------------------------------------------------------------------------------------------------------------------------------------------------|------------|
| F73A                          | <p>F73A variant introduced by site-directed mutagenesis in the cNMP domain with a N-terminal His tag cloned into pLAFR3 or without His tag into pET-28a</p>  | This study |
| E90A                          | <p>E90A variant introduced by site-directed mutagenesis in the cNMP domain with a N-terminal His tag cloned into pLAFR3 or without His tag into pET-28a</p>  | This study |
| H98A                          | <p>H98A variant introduced by site-directed mutagenesis in the cNMP domain with a N-terminal His tag cloned into pLAFR3 or without His tag into pET-28a</p>  | This study |
| N145A                         | <p>N145A variant introduced by site-directed mutagenesis in the cNMP domain with a N-terminal His tag cloned into pLAFR3 or without His tag into pET-28a</p> | This study |
| E146A                         | <p>E146A variant introduced by site-directed mutagenesis in the cNMP domain with a N-terminal His tag cloned into pLAFR3 or without His tag into pET-28a</p> | This study |
